# Supplementary material for: A Stable Genetic Transformation System and Implications of the Type IV Restriction System in the Nitrogen-Fixing Plant Endosymbiont Frankia alni ACN14a
Source: Front Microbiol. 2019 Sep 24;10:2230. doi: 10.3389/fmicb.2019.02230 (PMC6769113; doi:10.3389/fmicb.2019.02230)
Supplement: TABLE S2 — Standard curve and copy number calculations of plasmid pIGSAF determined by qPCR with relative and absolute quantification. [file Table_2.XLSX]

## Sheet: standard_curve
Dilution	DNA Template	Gene Target	Template (ng)	Copy Number	Log(Copy #)	Ct
1:1	pDiGc	egfp	84.1	1.12808e+10	10.0523	8.23851
1:10	pDiGc	egfp	8.41	1.12808e+09	9.05234	10.6288
1:100	pDiGc	egfp	0.841	1.12808e+08	8.05234	14.5542
1:1000	pDiGc	egfp	0.0841	1.12808e+07	7.05234	17.4358
1:10000	pDiGc	egfp	0.00841	1.12808e+06	6.05234	19.1206
1:100000	pDiGc	egfp	0.000841	112808	5.05234	21.9586
Dilution	DNA Template	Gene Target	Template (ng)	Copy Number	Log(Copy #)	Ct
1:1	F. alni Genome	nifH	612.1	7.44413e+07	7.87181	19.7536
1:10	F. alni Genome	nifH	61.21	7.44413e+06	6.87181	23.2547
1:100	F. alni Genome	nifH	6.121	744413	5.87181	24.7623
1:1000	F. alni Genome	nifH	0.6121	74441.3	4.87181	26.8071
1:10000	F. alni Genome	nifH	0.06121	7444.13	3.87181	29.2831
1:100000	F. alni Genome	nifH	0.006121	744.413	2.87181	32.6665

## Sheet: absolute_quantification
Sample	DNA Template	Gene Target	Ct	Log(Copy #)	Copy Number		Sample	Plasmid Copy Number	Genome Copy Number	Plasmid:Genome Ratio		Mean
1	pIGSAF ACN14a	infC	28.8576	4.22736	16879.5		1	363893	14145	25.7259		12.5959
2	pIGSAF ACN14a	infC	34.1646	2.03423	108.201		2	669.797	56.7652	11.7994
3	pIGSAF ACN14a	infC	18.5867	8.47192	2.96427e+08		3	2.05605e+09	3.12307e+08	6.58343
1	pIGSAF ACN14a	nif	29.2691	4.05731	11410.5
2	pIGSAF ACN14a	nif	37.3287	0.726649	5.32904
3	pIGSAF ACN14a	nif	18.4797	8.51612	3.28187e+08
1	pIGSAF ACN14a	egfp	25.6246	5.56097	363893
2	pIGSAF ACN14a	egfp	32.3363	2.82594	669.797
3	pIGSAF ACN14a	egfp	16.4171	9.31303	2.05605e+09

## Sheet: relative_quantification
Sample	DNA Template	Gene Target	Ct	ΔCt
1	pIGSAF ACN14a	infC	28.8576	Control
2	pIGSAF ACN14a	infC	34.1646	Control
3	pIGSAF ACN14a	infC	18.5867	Control
1	pIGSAF ACN14a	nifH	29.2691	0.4115
2	pIGSAF ACN14a	nifH	37.3287	3.16409
3	pIGSAF ACN14a	nifH	18.4797	-0.106966
						ΔΔCt	Fold-Change	Mean
1	pIGSAF ACN14a	egfp	25.6246	-3.23303		-3.64453	12.5058	11.8473
2	pIGSAF ACN14a	egfp	32.3363	-1.82823		-4.99232	31.8301
3	pIGSAF ACN14a	egfp	16.4171	-2.16956		-2.06259	4.17737
